# Supplementary material for: Latent and active aurone synthase from petals of C. grandiflora: a polyphenol oxidase with unique characteristics
Source: PubMed Central journal article supplement (PMC4540782; doi:10.1007/s00425-015-2261-0), 2015-02-20

## ONLINE RESOURCE

### **Latent and active aurone synthase from petals of *C. grandiflora*: a polyphenol oxidase with unique characteristics**

Christian Molitor, Stephan Gerhard Mauracher, Sanela Pargan, Rupert L. Mayer, Heidi Halbwirth,  
Annette Rompel\*

\* Corresponding author: Annette Rompel, Institut für Biophysikalische Chemie, Fakultät für Chemie,  
Universität Wien, Althanstraße 14, 1090 Wien, Austria.

E-mail: [annette.rompel@univie.ac.at](mailto:annette.rompel@univie.ac.at)

**Online Resource Fig. S2** Positive mode ESI-QTOF mass spectra of purified active *cgAUS* samples. Just prior to measurements acetonitrile and formic acid were added to a final concentration of 25 % (v/v) ACN and 0.05 % (v/v) formic acid. Non-reducing conditions: samples were desalted to 10 mM ammonium acetate pH 5.0. Reducing conditions: samples were incubated for 45 min at 50 °C in 20 mM ammonium acetate pH 7.5, supplemented with 50 mM DTT. Masses determined from charge deconvolution of these mass spectra and the respective deduced sequence of identified mass species are listed in Table S3. **a** Entire and magnified mass spectra of sample 2 under non-reducing conditions. **b** Entire and magnified mass spectra of sample 2 under reducing conditions. **c** Entire and magnified mass spectra of sample 3 under non-reducing conditions. **d** Entire and magnified mass spectra of sample 3 under reducing conditions. **e** Entire and magnified mass spectra of sample 4 under non-reducing conditions. **f** Entire and magnified mass spectra of sample 4 under reducing conditions

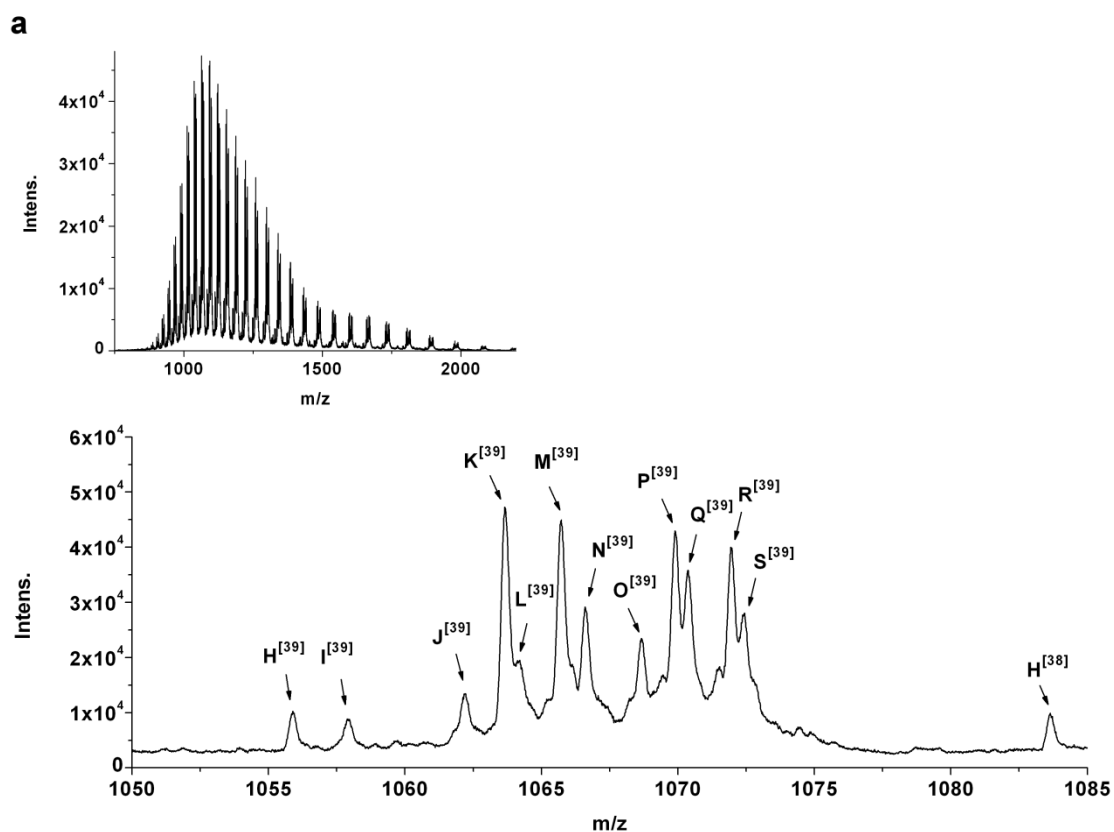

**b**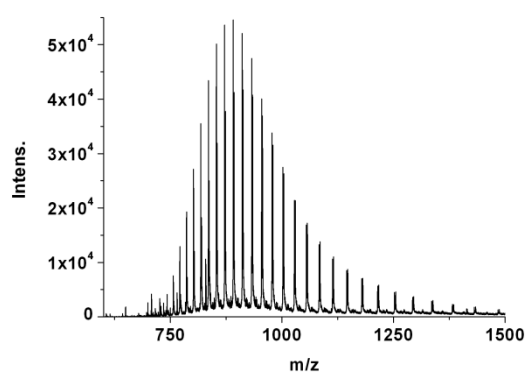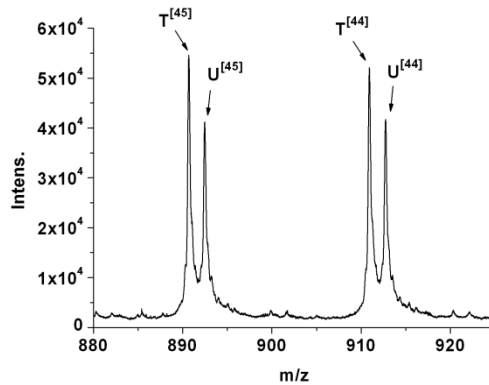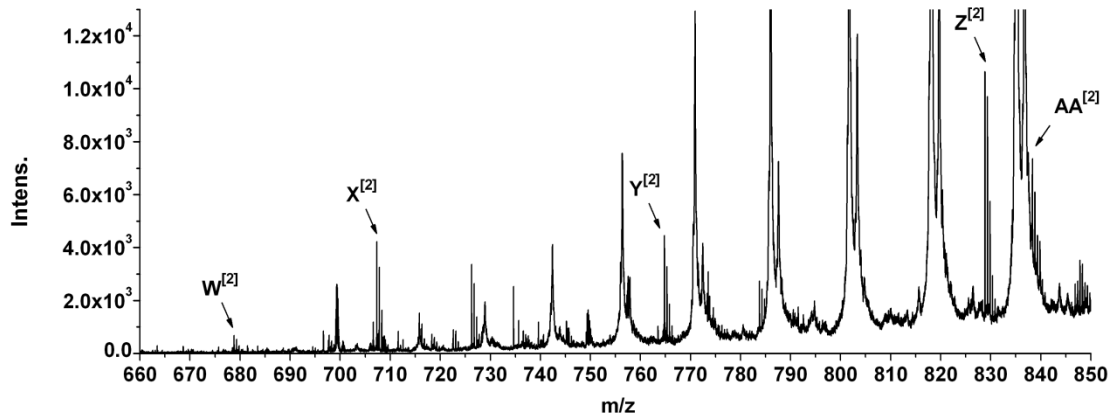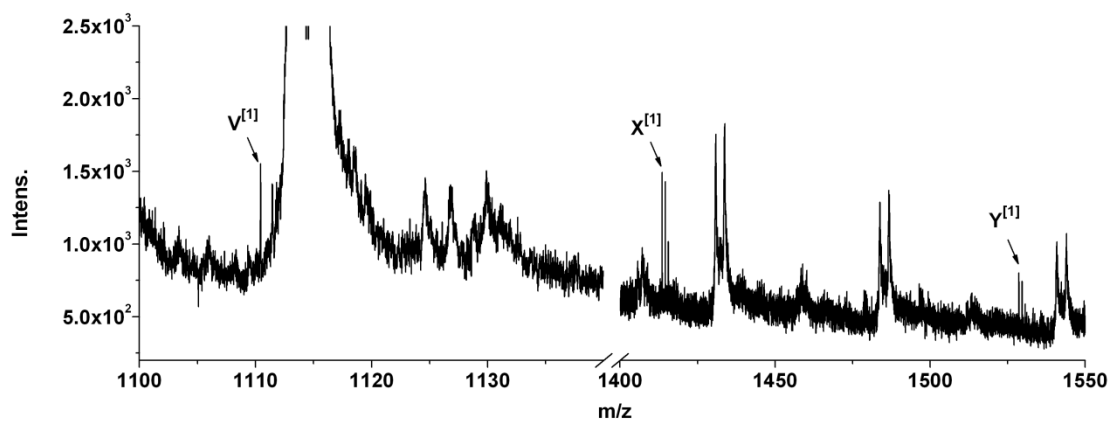**c**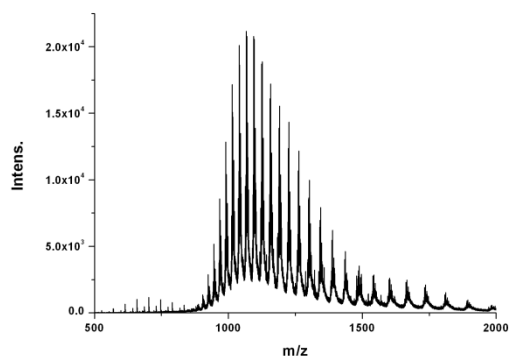

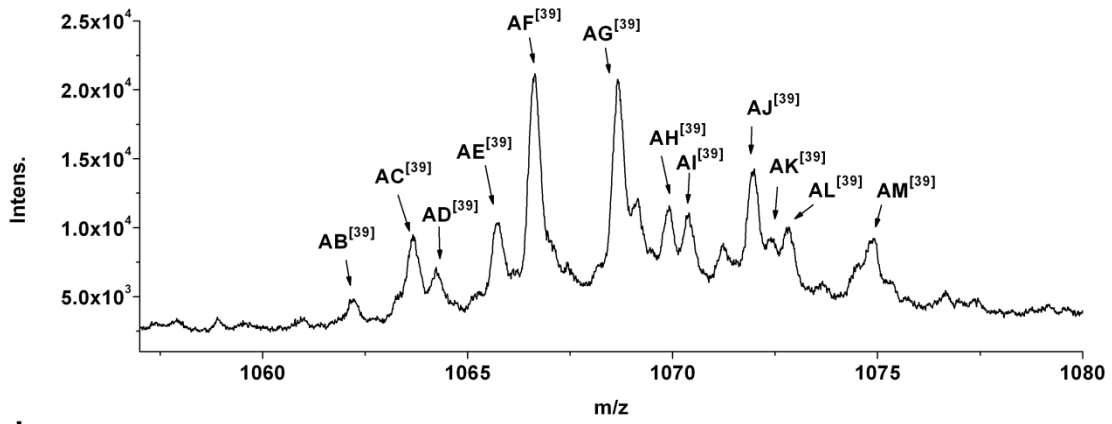

**d**

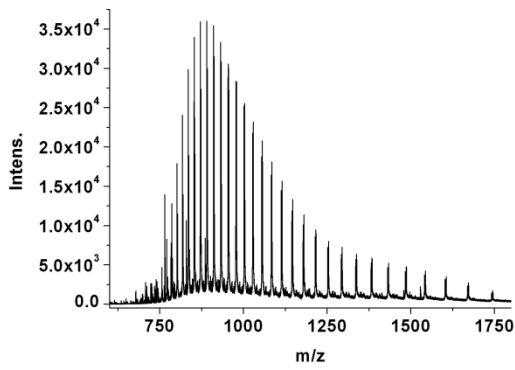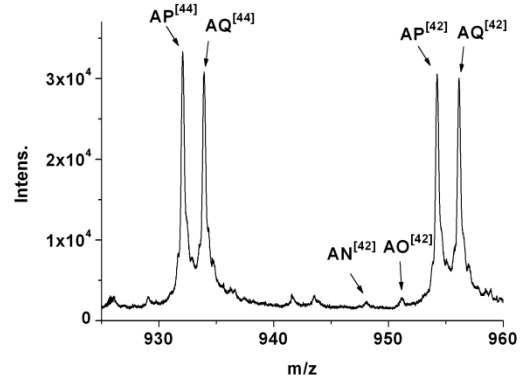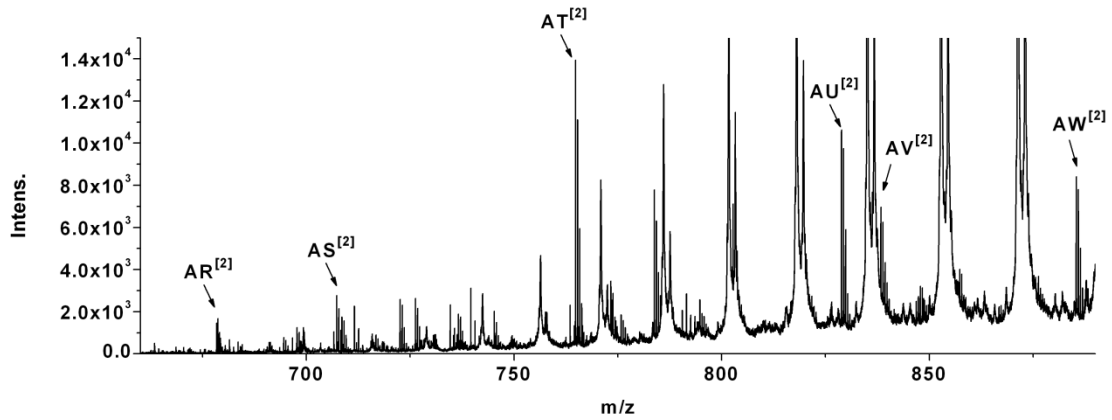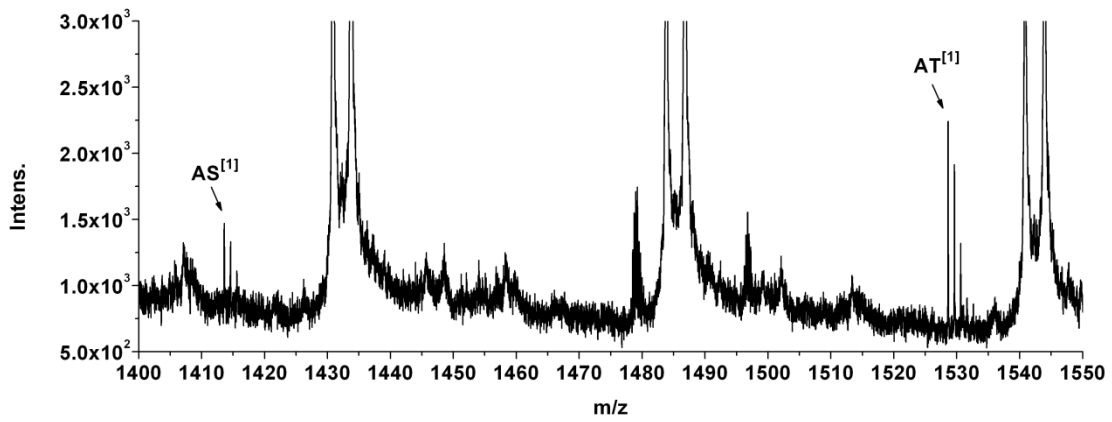

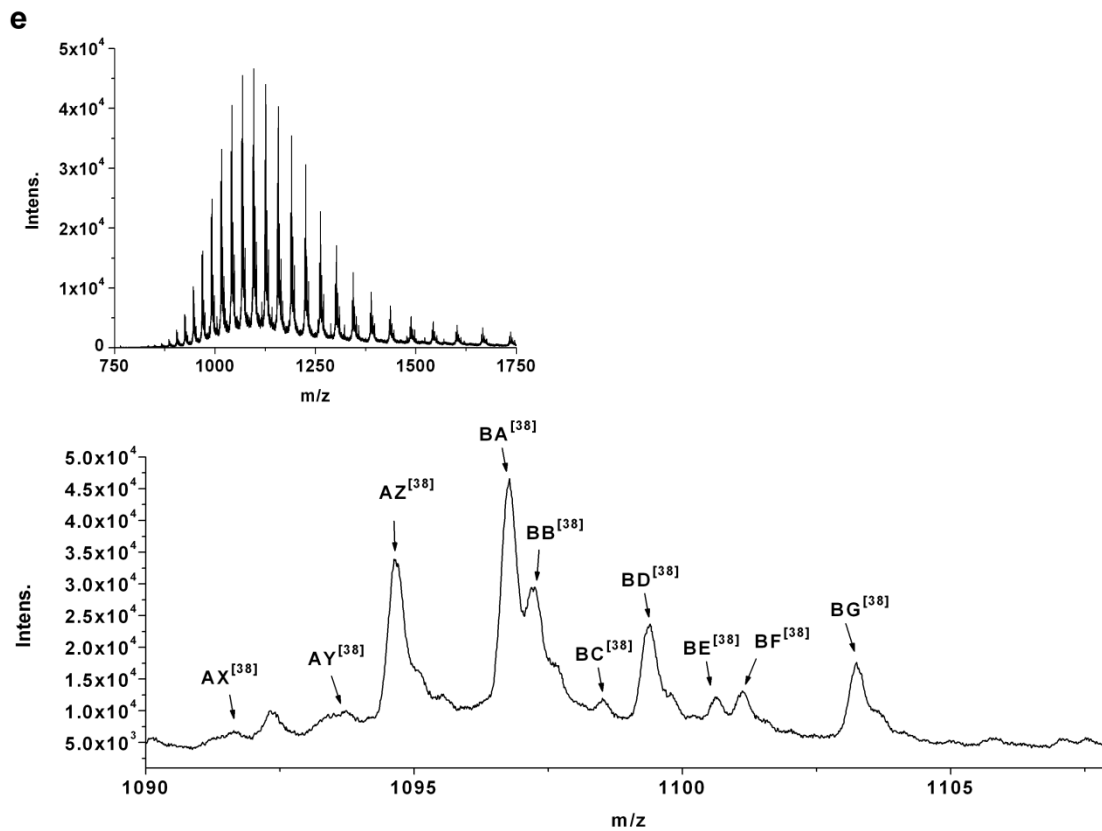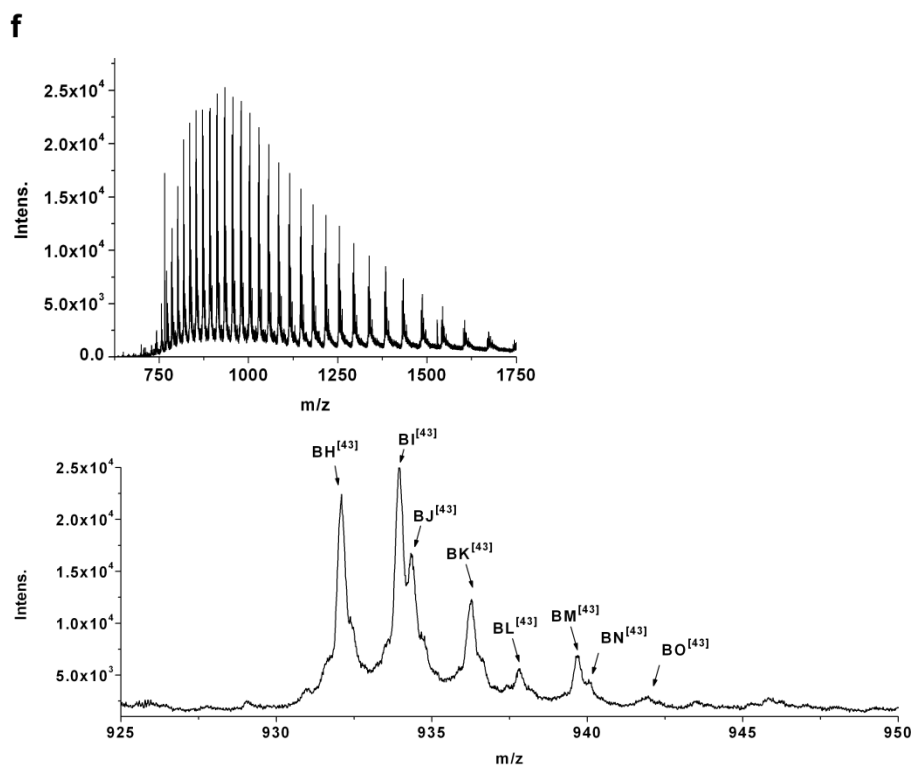

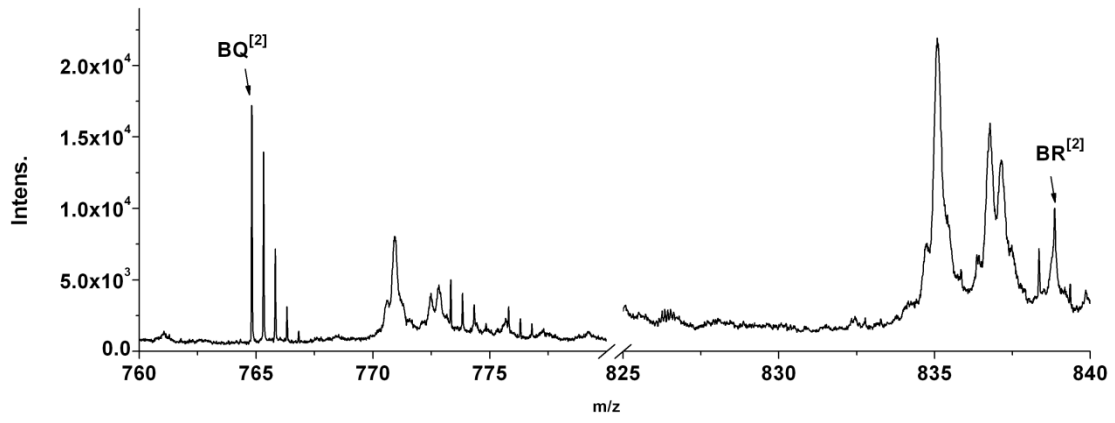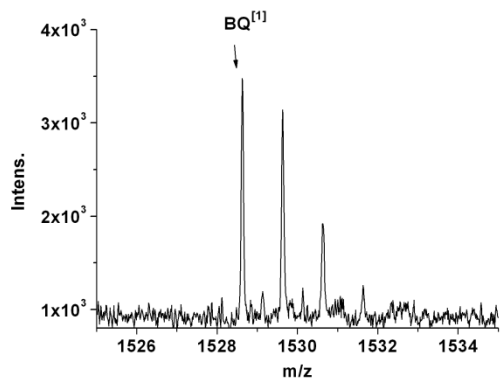

Supplement: 425_2015_2261_MOESM2_ESM.pdf [file 425_2015_2261_MOESM2_ESM.pdf]
